# Supplementary material
Source: Research Square preprint supplement (doi:10.21203/rs.3.rs-9173739/v1)
Supplement: Supplementary file 1 [file 989496fccfddecb2edfa377a.docx]

**Table 1. Baseline clinical characteristics of the MDS subjects.**

| **Variable** | **All**  (*N* = 687) | **Training cohort**  (*N* = 412) | **Validation cohort**  (*N* = 275) | ***P* value** |
| --- | --- | --- | --- | --- |
| **Age at diagnosis, median years (IQR)** | 56 (46 – 64) | 56 (46 – 64) | 56 (45 – 64) | 0.77 a |
| **Sex, n (%)** |  |  |  | 0.98 b |
| Female | 242 (35) | 145 (35) | 97 (35) |  |
| Male | 445 (65) | 267 (65) | 178 (65) |  |
| **2016 revised WHO MDS subtype, n (%)** |  |  |  | 0.86 b |
| MDS with del5q abnormality | 10 (2) | 6 (2) | 4 (2) |  |
| MDS MLD | 227 (33) | 138 (34) | 89 (32) |  |
| MDS SLD | 53 (7) | 28 (7) | 25 (9) |  |
| MDS with EB1 | 142 (21) | 88 (21) | 54 (20) |  |
| MDS with EB2 | 170 (25) | 101 (24) | 69 (25) |  |
| MDS-SLD/MLD-RS | 63 (9) | 38 (9) | 25 (9) |  |
| MDS-U | 22 (3) | 13 (3) | 9 (3) |  |
| **Haemoglobin, median g/L (IQR)** | 80 (66 – 97) | 80 (66 – 96) | 81 (66 – 100) | 0.77 a |
| **Platelets, median 109/L (IQR)** | 62 (32 – 124) | 63 (32 – 127) | 59 (32 – 123) | 0.44 a |
| **White blood cell count, median 109/L (IQR)** | 2.60 (1.75 – 3.67) | 2.59 (1.82 – 3.69) | 2.60 (1.64 – 3.63) | 0.74 a |
| **Neutrophil count, median 109/L (IQR)** | 1.09 (0.63 – 1.95) | 1.08 (0.64 – 1.98) | 1.09 (0.62 – 1.85) | 0.69 a |
| **Blast percentage in bone marrow, median (IQR)** | 3 (0.5 – 7.5) | 3 (0.5 – 7) | 2.5 (0.5 – 8) | 0.53 a |
| **Blast percentage in blood, median (IQR)** | 0 (0 – 0) | 0 (0 – 0) | 0 (0 – 0) | 0.16 a |
| **IPSS-R risk-stratification, n (%)** |  |  |  | 0.98 b |
| Very low | 29 (4) | 16 (4) | 13 (5) |  |
| Low | 147 (22) | 87 (21) | 60 (22) |  |
| Intermediate | 212 (31) | 128 (31) | 84 (31) |  |
| High | 167 (24) | 102 (25) | 65 (23) |  |
| Very high | 132 (19) | 79 (19) | 53 (19) |  |
| **IPSS-M risk-stratification, n (%)** |  |  |  | 0.41 b |
| Very low | 19 (3) | 10 (2) | 9 (3) |  |
| Low | 116 (17) | 67 (16) | 49 (18) |  |
| Moderate low | 97 (14) | 57 (14) | 40 (15) |  |
| Moderate high | 93 (13) | 55 (14) | 38 (14) |  |
| High | 175 (26) | 117 (28) | 58 (21) |  |
| Very high | 187 (27) | 106 (26) | 81 (29) |  |
| **FS-13 score, median (IQR)** | 0.42 (0.31 – 0.54) | 0.42 (0.31 – 0.50) | 0.42 (0.35 – 0.54) | 0.20 a |
| **MDS-CI score, n (%)** |  |  |  | 0.71 b |
| Low | 492 (72) | 297 (72) | 195 (71) |  |
| Intermediate | 174 (25) | 101 (25) | 73 (27) |  |
| High | 21 (3) | 14 (3) | 7 (3) |  |
| **Treatment, n (%)** |  |  |  | 0.28 b |
| Hypomethylating agent | 185 (27) | 108 (26) | 77 (28) |  |
| Immune modulation therapy | 177 (25) | 99 (24) | 78 (28) |  |
| Allo-HSCT | 99 (14) | 56 (14) | 43 (16) |  |
| Supportive care | 79 (12) | 55 (13) | 24 (9) |  |
| Other treatment | 29 (4) | 17 (4) | 12 (4) |  |
| Unknown | 118 (17) | 77 (19) | 41 (15) |  |

a, Wilcoxon test.

b, Chi-squared test.

**Abbreviations**: *Allo-HSCT* allogeneic hematopoietic stem cell transplantation,  *EB* excess blasts, *FS-13* 13-item frailty scale, *IPSS-R* the Revised International Prognostic Scoring System, *IPSS-M* the Molecular IPSS, *IQR* Inter-Quartile Range, *MDS* myelodysplastic neoplasms, *MDS-CI* MDS-specific Comorbidity Index, *MDS-U* MDS unclassifiable, *MLD* multilineage dysplasia, *RS* ring sideroblast, *SLD* single lineage dysplasia.
