# Supplementary material
Source: Research Square preprint supplement (doi:10.21203/rs.3.rs-9173739/v1)
Supplement: Supplementary file 2 [file d3a61deac931d127f50d0f9e.pdf]

## Supplementary Information

### Frailty and comorbidity improve IPSS-M prognostic stratification in myelodysplastic neoplasms

Xin Wang<sup>\*1,2,3</sup>, Qiujin Shen<sup>\*1,3</sup>, Songyang Zhao<sup>\*1,2,3</sup>, Saibing Qi<sup>\*1,3</sup>, Xiaowen Gong<sup>\*1,3</sup>, Bing Li<sup>1,2,3</sup>, Tiejun Qin<sup>2,3</sup>, Zefeng Xu<sup>1,2,3</sup>, Shiqiang Qu<sup>1,2,3</sup>, Wei Zhang<sup>1,3</sup>, Lijuan Pan<sup>2,3</sup>, Meng Jiao<sup>2,3</sup>, Xiaolin Zhai<sup>1,3</sup>, Qingyan Gao<sup>1,2,3</sup>, Jinying Zhao<sup>2,3</sup>, Yating Liu<sup>2,3</sup>, Yahui Feng<sup>1,3</sup>, Fuhui Li<sup>1,2,3</sup>, Linlin Liu<sup>1,2,3</sup>, Binhan Jiang<sup>1,2,3</sup>, Yue Zhong<sup>1,2,3</sup>, Junren Chen<sup>1,3</sup> ✉, Zhijian Xiao<sup>1,2,3</sup> ✉

<sup>1</sup> State Key Laboratory of Experimental Hematology, National Clinical

Research Center for Blood Diseases, Haihe Laboratory of Cell

Ecosystem, Institute of Hematology and Blood Diseases Hospital,

Chinese Academy of Medical Sciences & Peking Union Medical College,

Tianjin, China.

<sup>2</sup> MDS and MPN Centre, Institute of Hematology and Blood Diseases

Hospital, Chinese Academy of Medical Sciences & Peking Union Medical

College, Tianjin, China.

<sup>3</sup> Tianjin Institutes of Health Science, Tianjin, China.

✉ Corresponding authors

\* Xin Wang, Qiujin Shen, Songyang Zhao, Saibing Qi, and Xiaowen Gong

contributed equally to this work.

**Supplement Table S1. Reference ranges of variables for FS-13 calculation at the IHCAMS.**

| Item     | Full name              | Reference range in adults | Unit               |
|----------|------------------------|---------------------------|--------------------|
| ALP      | Alkaline phosphatase   | 50 – 135                  | U/L                |
| ALT      | Alanine                | 7 – 40                    | U/L                |
| Ferritin | Ferritin               | 23.9 – 336.2              | ng/mL              |
| LDH      | Lactate                | 120 – 250                 | U/L                |
| MCV      | Mean corpuscular       | 80 – 100                  | fL                 |
| RDW      | Red blood cell         | 11 – 14.1                 | %                  |
| RET      | Reticulocyte count     | 0.024 – 0.084             | $\times 10^{12}/L$ |
| TBIL     | Total Bilirubin        | 0 – 21                    | $\mu\text{mol}/L$  |
| WBC      | White blood cell count | 4 – 10                    | $\times 10^9/L$    |

**Abbreviations:** *IHCAMS* Institute of Hematology, Chinese Academy of Medical Sciences.

**Supplement Table S2. Comorbidity and frailty items in the training and validation sets.**

| <b>Variable</b>                    | <b>All<br/>(N = 687)</b> | <b>Training set<br/>(N = 412)</b> | <b>Validation set<br/>(N = 275)</b> | <b>P value <sup>a</sup></b> |
|------------------------------------|--------------------------|-----------------------------------|-------------------------------------|-----------------------------|
| <b>Comorbidities, n (%)</b>        |                          |                                   |                                     |                             |
| Cardiac disease                    | 67 (10)                  | 46 (11)                           | 21 (8)                              | 0.13                        |
| Cerebrovascular disease            | 26 (4)                   | 19 (5)                            | 7 (3)                               | 0.16                        |
| Diabetes                           | 92 (13)                  | 58 (14)                           | 34 (12)                             | 0.52                        |
| Endocrine disease                  | 17 (2)                   | 10 (2)                            | 7 (3)                               | 0.92                        |
| Gastrointestinal disease           | 14 (2)                   | 9 (2)                             | 5 (2)                               | 0.74                        |
| Hypertension                       | 112 (16)                 | 66 (16)                           | 46 (17)                             | 0.81                        |
| Mild hepatic disease               | 140 (20)                 | 85 (21)                           | 55 (20)                             | 0.84                        |
| Moderate to severe hepatic disease | 43 (6)                   | 27 (7)                            | 16 (6)                              | 0.70                        |
| Mild to moderate pulmonary disease | 148 (22)                 | 96 (23)                           | 52 (19)                             | 0.17                        |
| Severe pulmonary disease           | 20 (3)                   | 9 (2)                             | 11 (4)                              | 0.17                        |
| Obesity                            | 8 (1)                    | 6 (2)                             | 2 (1)                               | 0.38                        |
| Psychiatric disease                | 7 (1)                    | 5 (1)                             | 2 (1)                               | 0.53                        |
| Renal disease                      | 6 (1)                    | 3 (1)                             | 3 (1)                               | 0.62                        |
| Rheumatological disease            | 30 (4)                   | 20 (5)                            | 10 (4)                              | 0.44                        |
| Solid tumor                        | 21 (3)                   | 13 (3)                            | 8 (3)                               | 0.85                        |
| <b>FS-13 items, n (%)</b>          |                          |                                   |                                     |                             |
| ALP abnormal                       | 109 (16)                 | 68 (17)                           | 41 (15)                             | 0.58                        |
| ALT abnormal                       | 29 (4)                   | 17 (4)                            | 12 (4)                              | 0.88                        |
| Bilirubin abnormal                 | 39 (6)                   | 26 (6)                            | 13 (5)                              | 0.38                        |
| BMI with abnormal                  | 74 (11)                  | 49 (12)                           | 25 (9)                              | 0.49                        |
| BMI with partial abnormal          | 253 (37)                 | 148 (36)                          | 105 (38)                            | 0.49                        |
| CCr with abnormal                  | 2 (0.3)                  | 2 (0.5)                           | 0 (0)                               | 0.22                        |
| CCr with partial abnormal          | 29 (4)                   | 14 (3)                            | 15 (6)                              | 0.22                        |
| Ferritin abnormal                  | 431 (63)                 | 256 (62)                          | 175 (64)                            | 0.69                        |
| LDH abnormal                       | 253 (37)                 | 142 (35)                          | 111 (40)                            | 0.12                        |
| MCV abnormal                       | 369 (54)                 | 220 (53)                          | 149 (54)                            | 0.84                        |
| RDW abnormal                       | 590 (86)                 | 350 (85)                          | 240 (87)                            | 0.39                        |
| RET abnormal                       | 303 (44)                 | 183 (44)                          | 120 (44)                            | 0.84                        |
| Selfcare ability abnormal          | 22 (3)                   | 11 (3)                            | 11 (4)                              | 0.33                        |
| WBC abnormal                       | 562 (82)                 | 335(81)                           | 227 (83)                            | 0.68                        |

<sup>a</sup>, Chi-squared test.

**Abbreviations:** *ALP* alkaline phosphatase, *ALT* alanine aminotransferase, *BMI* body mass index, *CCr* creatinine clearance, *LDH* lactate dehydrogenase, *MCV* mean corpuscular volume, *RDW* red blood cell distribution width, *RET* reticulocyte count, *WBC* white blood cell count.

**Supplement Table S3. Baseline clinical characteristics of the down-graders and the stay-putters from the IPSS-M high-risk stratum.**

| <b>Variable</b>                                              | <b>Down-graders<br/>from the IPSS-M<br/>high-risk stratum<br/>(N = 136)</b> | <b>Stay-putters<br/>from the IPSS-M<br/>high-risk stratum<br/>(N = 39)</b> | <b>P value</b>      |
|--------------------------------------------------------------|-----------------------------------------------------------------------------|----------------------------------------------------------------------------|---------------------|
| <b>Age at diagnosis, median years (IQR)</b>                  | 54 (46 – 60)                                                                | 69 (65 – 72)                                                               | <0.001 <sup>a</sup> |
| <b>Sex, n (%)</b>                                            |                                                                             |                                                                            | 0.68 <sup>b</sup>   |
| Female                                                       | 49 (36)                                                                     | 12 (31)                                                                    |                     |
| Male                                                         | 87 (64)                                                                     | 27 (69)                                                                    |                     |
| <b>2016 revised WHO MDS subtype, n (%)</b>                   |                                                                             |                                                                            | 0.09 <sup>b</sup>   |
| MDS with del5q abnormality                                   | 1 (1)                                                                       | 0 (0)                                                                      |                     |
| MDS MLD                                                      | 45 (33)                                                                     | 8 (21)                                                                     |                     |
| MDS SLD                                                      | 10 (7)                                                                      | 3 (7)                                                                      |                     |
| MDS with EB1                                                 | 32 (24)                                                                     | 14(36)                                                                     |                     |
| MDS with EB2                                                 | 45 (33)                                                                     | 10 (26)                                                                    |                     |
| MDS-SLD/MLD-RS                                               | 3 (2)                                                                       | 3 (7)                                                                      |                     |
| MDS-U                                                        | 0 (0)                                                                       | 1 (3)                                                                      |                     |
| <b>Haemoglobin, median g/L (IQR)</b>                         | 72 (62 – 86)                                                                | 79 (66 – 93)                                                               | 0.15 <sup>a</sup>   |
| <b>Platelets, median 10<sup>9</sup>/L (IQR)</b>              | 59 (30 – 110)                                                               | 39 (23 – 72)                                                               | 0.04 <sup>a</sup>   |
| <b>White blood cell count, median 10<sup>9</sup>/L (IQR)</b> | 2.38 (1.75 – 3.40)                                                          | 2.20 (1.36 – 2.94)                                                         | 0.12 <sup>a</sup>   |
| <b>Neutrophil count, median 10<sup>9</sup>/L (IQR)</b>       | 0.99 (0.64 – 1.88)                                                          | 0.90 (0.57 – 1.75)                                                         | 0.54 <sup>a</sup>   |
| <b>Blast percentage in bone marrow, median (IQR)</b>         | 4 (1 – 8)                                                                   | 5.5 (1.25 – 8.25)                                                          | 0.38 <sup>a</sup>   |
| <b>Blast percentage in blood, median (IQR)</b>               | 0 (0 – 0)                                                                   | 0 (0 – 0)                                                                  | 0.61 <sup>a</sup>   |
| <b>IPSS-R risk-stratification, n (%)</b>                     |                                                                             |                                                                            | 0.32 <sup>b</sup>   |
| Very low                                                     | 0 (0)                                                                       | 0 (0)                                                                      |                     |
| Low                                                          | 6 (4)                                                                       | 1 (3)                                                                      |                     |
| Intermediate                                                 | 55 (40)                                                                     | 13 (33)                                                                    |                     |
| High                                                         | 55 (40)                                                                     | 22 (56)                                                                    |                     |
| Very high                                                    | 20 (15)                                                                     | 3 (8)                                                                      |                     |
| <b>FS-13 score, median (IQR)</b>                             | 0.38 (0.35 – 0.50)                                                          | 0.46 (0.35 – 0.58)                                                         | 0.04 <sup>a</sup>   |
| <b>MDS-CI score, n (%)</b>                                   |                                                                             |                                                                            | <0.001 <sup>b</sup> |
| Low                                                          | 106 (78)                                                                    | 17 (44)                                                                    |                     |
| Intermediate                                                 | 26 (19)                                                                     | 17 (44)                                                                    |                     |

High

4 (3)

5 (13)

---

<sup>a</sup>, Wilcoxon test.

<sup>b</sup>, Chi-squared test.

**Abbreviations:** *EB* excess blasts; *FS-13* 13-item frailty scale, *IPSS-R* the Revised International Prognostic Scoring System, *IQR* Inter-Quartile Range, *MDS* myelodysplastic neoplasms, *MDS-CI* MDS-specific Comorbidity Index, *MDS-U* MDS unclassifiable, *MLD* multilineage dysplasia, *RS* ring sideroblast, *SLD* single lineage dysplasia.

**Supplement Table S4. Baseline clinical characteristics of the down-graders and the stay-putters from the IPSS-M very high-risk stratum.**

| <b>Variable</b>                                              | <b>Down-graders from the IPSS-M very high-risk stratum (N = 117)</b> | <b>Stay-putters from the IPSS-M very high-risk stratum (N = 70)</b> | <b>P value</b>      |
|--------------------------------------------------------------|----------------------------------------------------------------------|---------------------------------------------------------------------|---------------------|
| <b>Age at diagnosis, median years (IQR)</b>                  | 54 (39 – 63)                                                         | 63 (58 – 68)                                                        | <0.001 <sup>a</sup> |
| <b>Sex, n (%)</b>                                            |                                                                      |                                                                     | 0.09 <sup>b</sup>   |
| Female                                                       | 40 (34)                                                              | 15 (21)                                                             |                     |
| Male                                                         | 77 (66)                                                              | 55 (79)                                                             |                     |
| <b>2016 revised WHO MDS subtype, n (%)</b>                   |                                                                      |                                                                     | 0.10 <sup>b</sup>   |
| MDS with del5q abnormality                                   | 1 (1)                                                                | 0 (0)                                                               |                     |
| MDS MLD                                                      | 16 (14)                                                              | 12 (17)                                                             |                     |
| MDS SLD                                                      | 0 (0)                                                                | 3 (4)                                                               |                     |
| MDS with EB1                                                 | 35 (30)                                                              | 18 (26)                                                             |                     |
| MDS with EB2                                                 | 58 (49)                                                              | 36 (51)                                                             |                     |
| MDS-SLD/MLD-RS                                               | 7 (6)                                                                | 0 (0)                                                               |                     |
| MDS-U                                                        | 0 (0)                                                                | 1 (2)                                                               |                     |
| <b>Haemoglobin, median g/L (IQR)</b>                         | 72 (61 – 85)                                                         | 70 (57 – 81)                                                        | 0.1 <sup>a</sup>    |
| <b>Platelets, median 10<sup>9</sup>/L (IQR)</b>              | 47 (26 – 89)                                                         | 51 (35 – 81)                                                        | 0.97 <sup>a</sup>   |
| <b>White blood cell count, median 10<sup>9</sup>/L (IQR)</b> | 2.44 (1.61 – 3.71)                                                   | 2.56 (1.88 – 3.34)                                                  | 0.93 <sup>a</sup>   |
| <b>Neutrophil count, median 10<sup>9</sup>/L (IQR)</b>       | 1.00 (0.51 – 2.06)                                                   | 0.94 (0.44– 1.85)                                                   | 0.44 <sup>a</sup>   |
| <b>Blast percentage in bone marrow, median (IQR)</b>         | 8 (4 – 12)                                                           | 7 (4 – 12)                                                          | 0.75 <sup>a</sup>   |
| <b>Blast percentage in blood, median (IQR)</b>               | 0 (0 – 2)                                                            | 0 (0 – 2)                                                           | 0.92 <sup>a</sup>   |
| <b>IPSS-R risk-stratification, n (%)</b>                     |                                                                      |                                                                     | 0.03 <sup>b</sup>   |
| Very low                                                     | 0 (0)                                                                | 0 (0)                                                               |                     |
| Low                                                          | 0 (0)                                                                | 3 (4)                                                               |                     |
| Intermediate                                                 | 16 (14)                                                              | 4 (6)                                                               |                     |
| High                                                         | 38 (32)                                                              | 19 (27)                                                             |                     |
| Very high                                                    | 63 (54)                                                              | 44 (63)                                                             |                     |
| <b>FS-13 score, median (IQR)</b>                             | 0.42 (0.35 – 0.50)                                                   | 0.50 (0.39 – 0.62)                                                  | <0.001 <sup>a</sup> |
| <b>MDS-CI score, n (%)</b>                                   |                                                                      |                                                                     | <0.001 <sup>b</sup> |
| Low                                                          | 114 (97)                                                             | 8 (11)                                                              |                     |

|              |       |         |
|--------------|-------|---------|
| Intermediate | 3 (3) | 54 (78) |
| High         | 0 (0) | 8 (11)  |

---

<sup>a</sup>, Wilcoxon test.

<sup>b</sup>, Chi-squared test.

**Abbreviations:** *EB* excess blasts; *FS-13* 13-item frailty scale, *IPSS-R* the Revised International Prognostic Scoring System, *IQR* Inter-Quartile Range, *MDS* myelodysplastic neoplasms, *MDS-CI* MDS-specific Comorbidity Index, *MDS-U* MDS unclassifiable, *MLD* multilineage dysplasia, *RS* ring sideroblast, *SLD* single lineage dysplasia.

**Supplement Table S5. Baseline clinical characteristics of the up-graders and the stay-putters from the IPSS-M low-risk stratum.**

| <b>Variable</b>                                              | <b>Up-graders from the IPSS-M low-risk stratum (N = 30)</b> | <b>Stay-putters from the IPSS-M low-risk stratum (N = 56)</b> | <b>P value</b>      |
|--------------------------------------------------------------|-------------------------------------------------------------|---------------------------------------------------------------|---------------------|
| <b>Age at diagnosis, median years (IQR)</b>                  | 57 (52 – 68)                                                | 60 (54 – 64)                                                  | 0.43 <sup>a</sup>   |
| <b>Sex, n (%)</b>                                            |                                                             |                                                               | 0.66 <sup>b</sup>   |
| Female                                                       | 7 (23)                                                      | 17 (30)                                                       |                     |
| Male                                                         | 23 (77)                                                     | 39 (70)                                                       |                     |
| <b>2016 revised WHO MDS subtype, n (%)</b>                   |                                                             |                                                               | 0.29 <sup>b</sup>   |
| MDS with del5q abnormality                                   | 1 (3)                                                       | 1 (2)                                                         |                     |
| MDS MLD                                                      | 11 (37)                                                     | 24 (42)                                                       |                     |
| MDS SLD                                                      | 3 (10)                                                      | 8 (14)                                                        |                     |
| MDS with EB1                                                 | 6 (20)                                                      | 4 (7)                                                         |                     |
| MDS with EB2                                                 | 1 (3)                                                       | 2 (4)                                                         |                     |
| MDS-SLD/MLD-RS                                               | 7 (24)                                                      | 11 (20)                                                       |                     |
| MDS-U                                                        | 1 (3)                                                       | 6 (11)                                                        |                     |
| <b>Haemoglobin, median g/L (IQR)</b>                         | 105 (91 – 120)                                              | 104 (86 – 120)                                                | 0.62 <sup>a</sup>   |
| <b>Platelets, median 10<sup>9</sup>/L (IQR)</b>              | 87 (42 – 205)                                               | 78 (55 – 170)                                                 | 0.65 <sup>a</sup>   |
| <b>White blood cell count, median 10<sup>9</sup>/L (IQR)</b> | 3.43 (2.21 – 5.66)                                          | 2.99 (2.19 – 4.05)                                            | 0.25 <sup>a</sup>   |
| <b>Neutrophil count, median 10<sup>9</sup>/L (IQR)</b>       | 2.35 (1.11 – 3.39)                                          | 1.52 (1.04 – 2.13)                                            | 0.17 <sup>a</sup>   |
| <b>Blast percentage in bone marrow, median (IQR)</b>         | 0.5 (0 – 3)                                                 | 1.0 (0 – 2)                                                   | 0.85 <sup>a</sup>   |
| <b>Blast percentage in blood, median (IQR)</b>               | 0 (0 – 0)                                                   | 0 (0 – 0)                                                     | 0.41 <sup>a</sup>   |
| <b>IPSS-R risk-stratification, n (%)</b>                     |                                                             |                                                               | 0.32 <sup>b</sup>   |
| Very low                                                     | 3 (10)                                                      | 13 (23)                                                       |                     |
| Low                                                          | 20 (67)                                                     | 32 (57)                                                       |                     |
| Intermediate                                                 | 7 (23)                                                      | 11 (20)                                                       |                     |
| High                                                         | 0 (0)                                                       | 0 (0)                                                         |                     |
| Very high                                                    | 0 (0)                                                       | 0 (0)                                                         |                     |
| <b>FS-13 score, median (IQR)</b>                             | 0.62 (0.40 – 0.62)                                          | 0.38 (0.30 – 0.46)                                            | <0.001 <sup>a</sup> |
| <b>MDS-CI score, n (%)</b>                                   |                                                             |                                                               | <0.001 <sup>b</sup> |
| Low                                                          | 13 (43)                                                     | 47 (84)                                                       |                     |
| Intermediate                                                 | 14 (47)                                                     | 9 (16)                                                        |                     |

High

3 (10)

0 (0)

---

<sup>a</sup>, Wilcoxon test.

<sup>b</sup>, Chi-squared test.

**Abbreviations:** *EB* excess blasts; *FS-13* 13-item frailty scale, *IPSS-R* the Revised International Prognostic Scoring System, *IQR* Inter-Quartile Range, *MDS* myelodysplastic neoplasms, *MDS-CI* MDS-specific Comorbidity Index, *MDS-U* MDS unclassifiable, *MLD* multilineage dysplasia, *RS* ring sideroblast, *SLD* single lineage dysplasia.

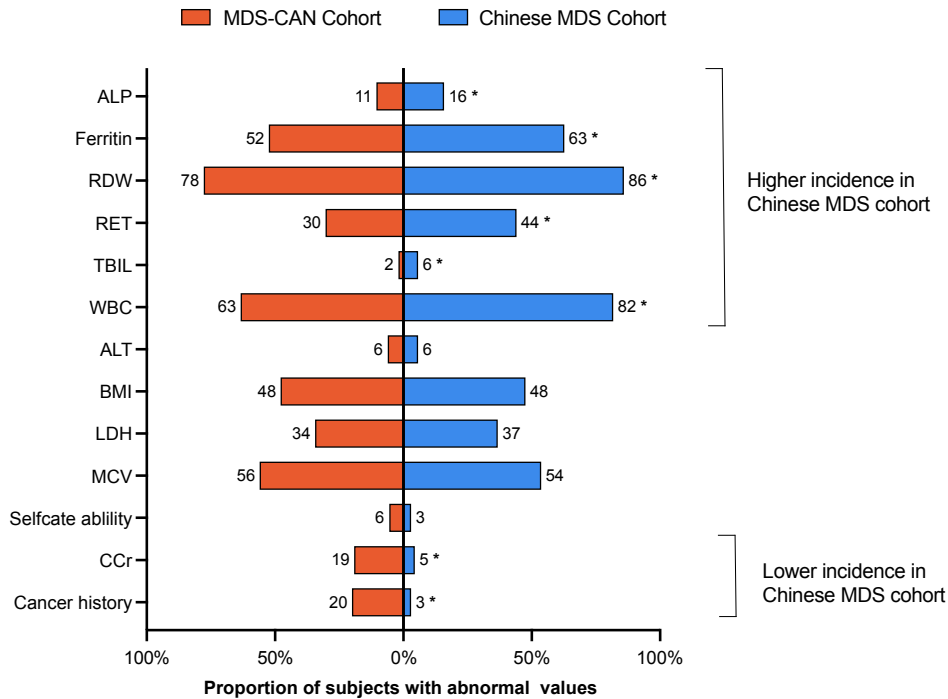

**Supplement Figure S1. Comparison of FS-13 items between the Chinese MDS cohort and the MDS-CAN cohort.**

*ALP* alkaline phosphatase, *ALT* alanine aminotransferase, *BMI* abnormal body mass index, *CCr* creatinine clearance, *LDH* lactate dehydrogenase, *MCV* mean corpuscular volume, *MDS-CAN* Myelodysplastic Syndromes-Canada, *RDW* red blood cell distribution width, *RET* reticulocyte count, *WBC* white blood cell count. \*  $P < 0.05$  (Chi-squared test).
