# Supplementary material
Source: Research Square preprint supplement (doi:10.21203/rs.3.rs-9173739/v1)
Supplement: Supplementary file 3 [file e8ff6f719d99fc0217cccc02.docx]

**Table 2. Correspondence between IPSS-M- and Integrated IPSS-M-defined risk-strata**

|  |  | **Integrated IPSS-M** | | | | | |
| --- | --- | --- | --- | --- | --- | --- | --- |
| **IPSS-M** |  | **Very high** | **High** | **Moderate high** | **Moderate low** | **Low** | **Very low** |
| **Very high** | 70 | 74 | 17 | 26 | 0 | 0 |
| **High** | 0 | 39 | 81 | 32 | 20 | 3 |
| **Moderate high** | 0 | 6 | 30 | 24 | 25 | 8 |
| **Moderate low** | 0 | 0 | 18 | 10 | 65 | 4 |
| **Low** | 0 | 3 | 18 | 9 | 56 | 30 |
| **Very low** | 0 | 0 | 2 | 4 | 7 | 6 |

Shown values are numbers of subjects.
